# Supplementary figures and images for: The Lymphatic System—A Surgeon’s Point of View
Source: MDPI journal article supplement (doi:10.3390/lymphatics1020013), 2023-08-21

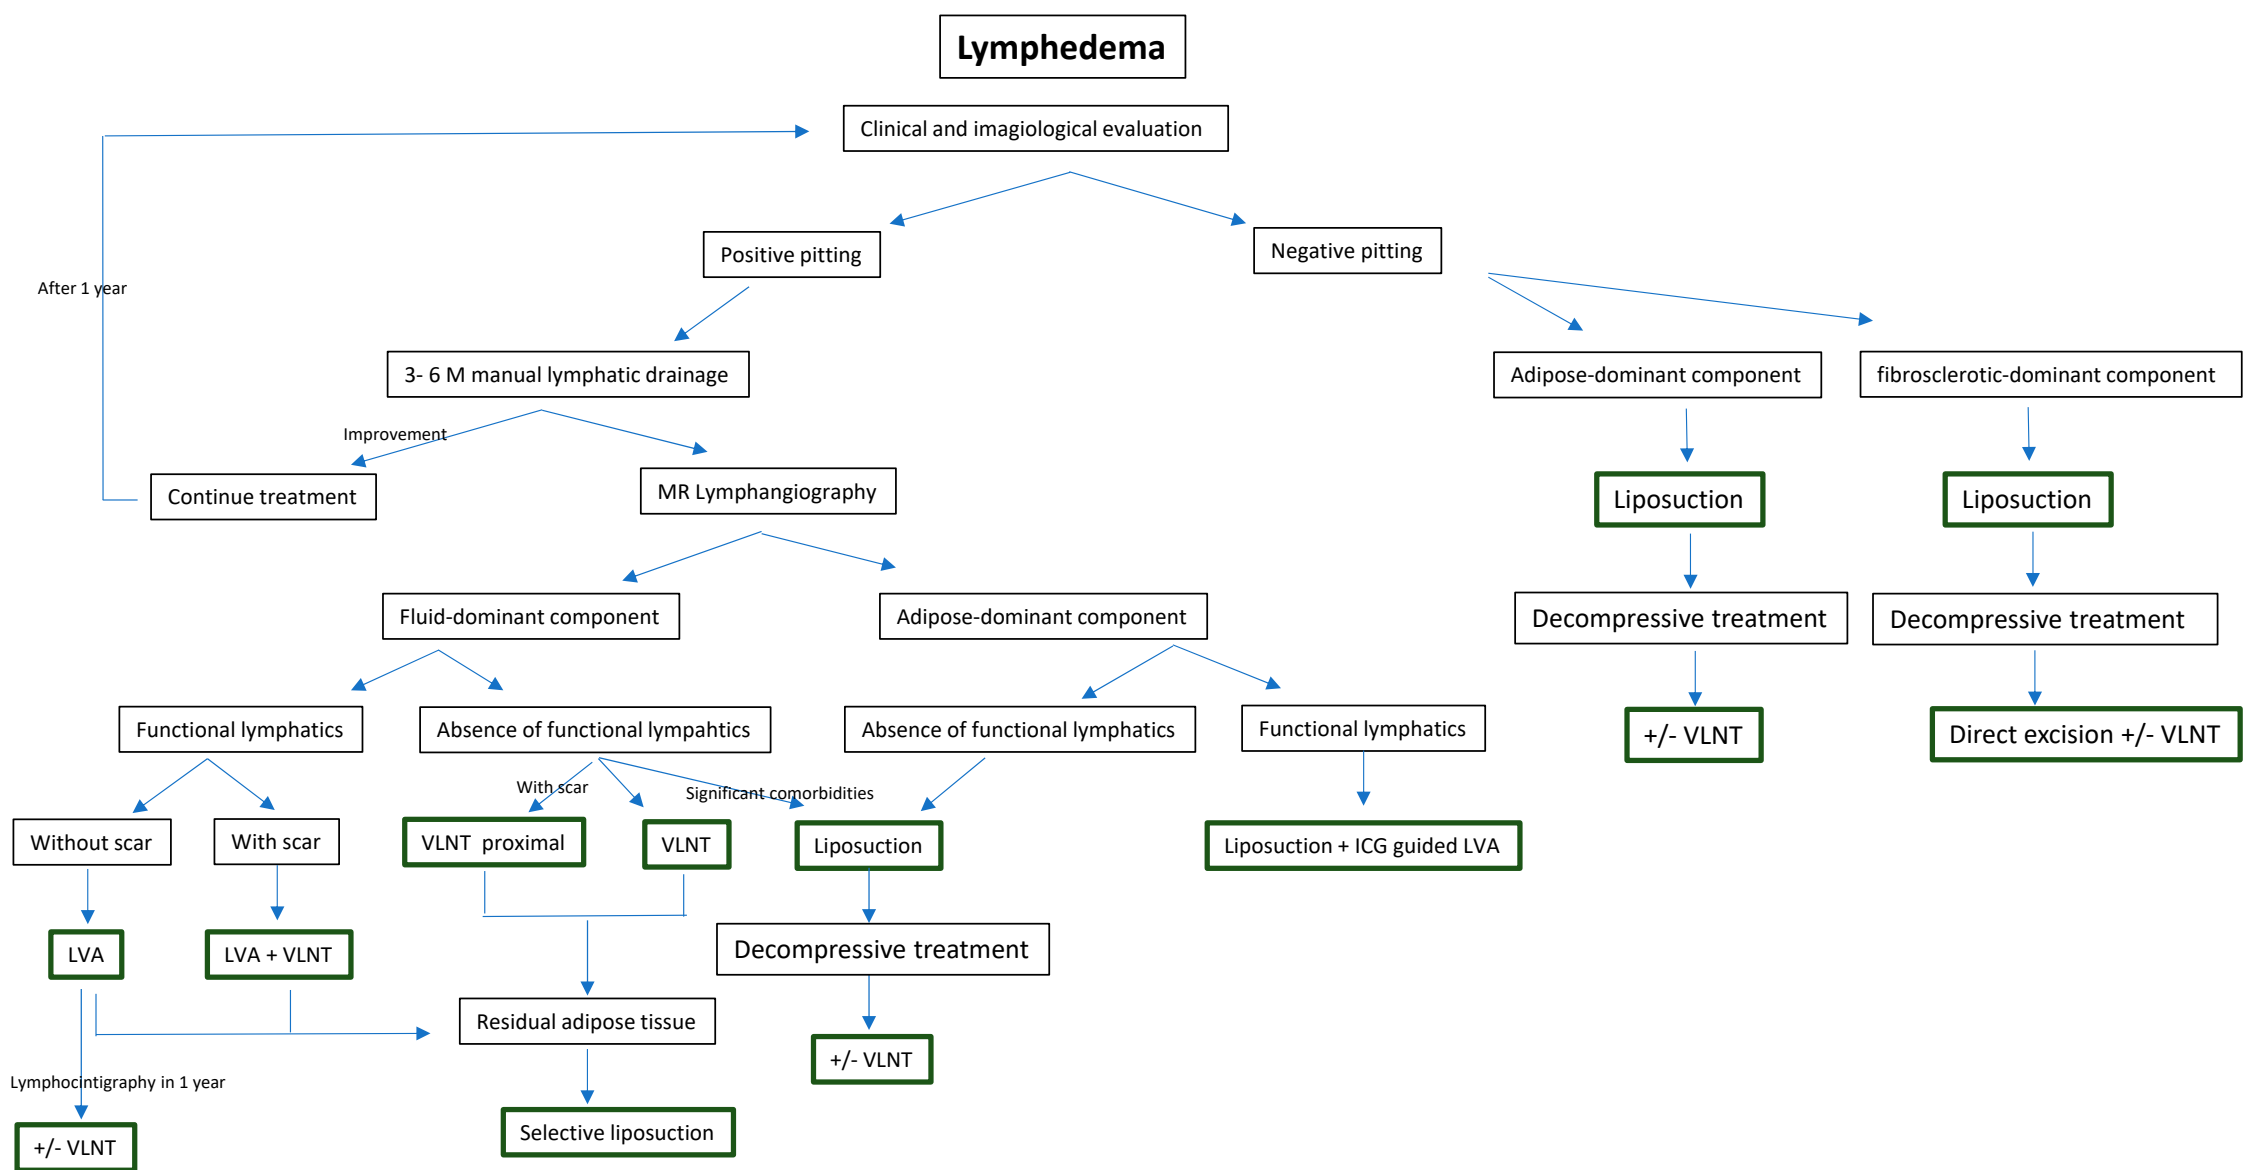

Figure S1: A treatment algorithm for patients with symptoms of lymphedema.

Supplement: s1 [file s1]
